# Supplementary material for: Coronarin D, a labdane diterpene, inhibits both constitutive and inducible nuclear factor-κB pathway activation, leading to potentiation of apoptosis, inhibition of invasion, and suppression of osteoclastogenesis
Source: Oxford University Press journal article supplement (doi:10.1158/1535-7163.mct-08-0432), 2008-10-01
Supplement: 15357163mct080432-sup-mct-08-0432--suppl_fig_legends.pdf [file 15357163mct080432-sup-mct-08-0432--suppl_fig_legends.pdf]

### **Supplementary Figure Legends:**

**Supple. Fig. 1.** Coronarin D induced NF- $\kappa$ B inhibition is not reversible. U266 cells ( $2 \times 10^6$ ) were treated with coronarin D for 8 h, washed 2 times in PBS, suspended in fresh medium, cells were harvested in different time intervals, nuclear extracts were prepared and NF- $\kappa$ B activity was analyzed by EMSA.

**Supple. Fig. 2.** Direct effect of coronarin D on IKK activation induced by TNF. Whole cell extracts were prepared from KBM-5 cells treated with 1 nM TNF and immunoprecipitated with anti-IKK- antibody. The immunocomplex kinase assay was performed in the absence or presence of the indicated concentration of coronarin D.

**Supple. Fig. 3. (A).** Coronarin D inhibited NF- $\kappa$ B activation in IKK constitutive cell line. U266 cells ( $2 \times 10^6$ ) were treated with different concentrations of coronarin D for 8 h, nuclear extracts were prepared and the NF- $\kappa$ B activity was analyzed by EMSA. **(B).** Coronarin D inhibited constitutive IKK in constitutive NF- $\kappa$ B expressing cell line U266. U266 cells ( $2 \times 10^6$ ) were treated with different concentrations of coronarin D for 8 h, whole cell lysate were prepared and the kinase assay was done as described in materials and methods.
